# Supplementary material for: miR-125b-5p enhances chemotherapy sensitivity to cisplatin by down-regulating Bcl2 in gallbladder cancer
Source: PubMed Central journal article supplement (PMC5335654; doi:10.1038/srep43109), 2017-03-03
Supplement: srep43109-s1.pdf [file srep43109-s1.pdf]

**miR-125b-5p enhances chemotherapy sensitivity to cisplatin by down-regulating Bcl2 in  
gallbladder cancer**

Dong Yang, Ming Zhan, Tao Chen, Wei Chen, Yunhe Zhang, Sunwang Xu, Jinchun Yan,  
Qihong Huang, and Jian Wang

**Supplementary Figure 1.** Uncropped immunoblot gel of Bcl2 expression.

**Supplementary Table 1.** PCR primer sequences.

# Supplementary Figure 1

**NOZ**

**GBC-SD**

**SGC-996**

**BCL2**

**β-actin**

**BCL2**

**β-actin**

**BCL2**

**β-actin**

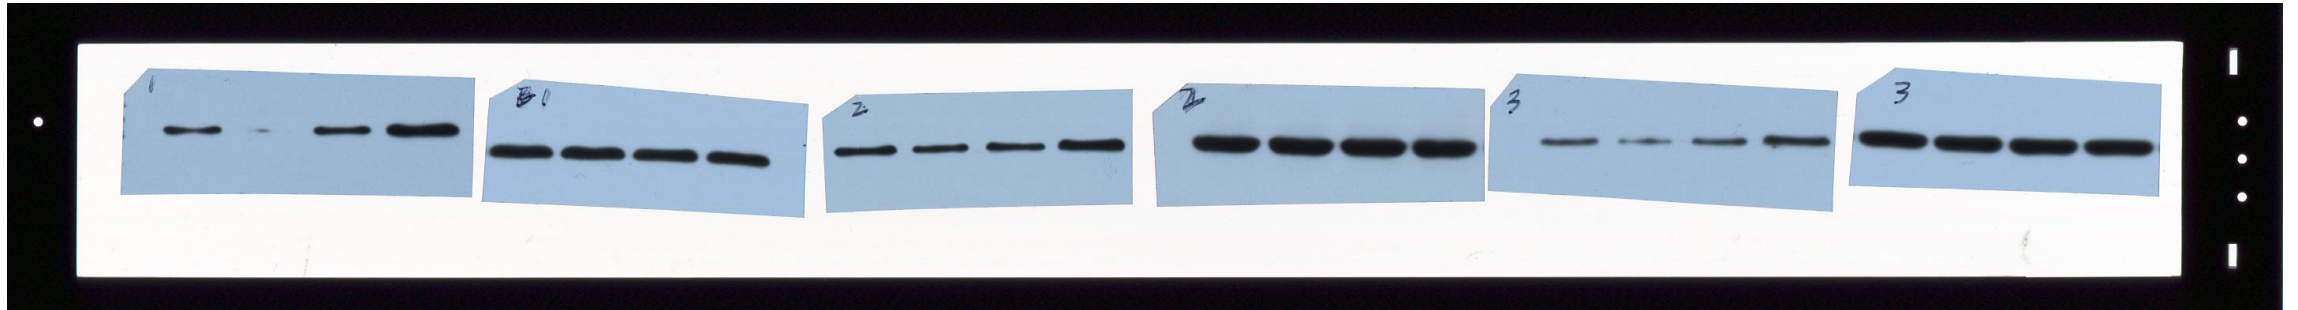

Control mimic  
miR-125b-5p mimic  
Antisense control  
Antisense miR-125b-5p

### Supplementary Table 1 Primers of qPCR

| Genes ( <i>Homo sapiens</i> ) | Primers   | Sequences                       |
|-------------------------------|-----------|---------------------------------|
| <i>miR-125b-5p</i>            | Anchor    | CGACTCGATCCAGTCTCAGGGTCCGAGGTAT |
|                               | RT primer | TCGATCGAGTCGCACTTTTTTTTTTTT     |
|                               | Forward   | 5'-TCCCTGAGACCCTAACTTGTGA-3'    |
|                               | Reverse   | 5'-AGTCTCAGGGTCCGAGGTATTC-3'    |
| <i>U6</i>                     | Forward   | 5'-CTCGCTTCGGCAGCACA-3'         |
|                               | Reverse   | 5'-AACGCTTCACGAATTTGCGT-3'      |
| <i>BCL2</i>                   | Forward   | 5'-CAACATCGCCCTGTGGATGA-3'      |
|                               | Reverse   | 5'-GGCCAAACTGAGCAGAGTCT-3'      |
| <i>GAPDH</i>                  | Forward   | 5'-GAAGGTGAAGGTCGGAGTC-3'       |
|                               | Reverse   | 5'-GAAGATGGTGATGGGATTTC-3'      |
